# Supplementary material for: Antimycobacterial, Cytotoxic, and Antioxidant Activities of Abietane Diterpenoids Isolated from Plectranthus madagascariensis
Source: Plants (Basel). 2021 Jan 19;10(1):175. doi: 10.3390/plants10010175 (PMC7832401; doi:10.3390/plants10010175)
Supplement: Supplementary file 1 [file plants-10-00175-s001.xlsx]

## Sheet: Sheet1
		7H9 CAS GLU Tx					7H9 ADC GLU Tw
Compound ID	PLATE ROW	GFP Assay - 10pt DR: MIC90 (ug/ml) [Media: 7H9 CAS GLU Tx, Day:7]	GFP Assay - 10pt DR: Dose-response Plot	GFP Assay - 10pt DR: MIC90 (ug/ml) [Media: 7H9 CAS GLU Tx, Day:14]	GFP Assay - 10pt DR: Dose-response Plot	Comments	GFP Assay - 10pt DR: MIC90 (ug/ml) [Media: 7H9 ADC GLU Tw, Day:7]	GFP Assay - 10pt DR: Dose-response Plot	GFP Assay - 10pt DR: MIC90 (ug/ml) [Media: 7H9 ADC GLU Tw, Day:14]	GFP Assay - 10pt DR: Dose-response Plot	Comments
1	A	62.5		60.629			>125		>125
5	B	>125		>125			>125		>125
2	C	15.226		15.625			14.956		33.649
3	D	14.339		3.961			>125		>125		ADC MIC is increased > 4 fold which may be due to serum binding
4	F	15.625		1.935			>125		>125		ADC MIC is increased > 4 fold which may be due to serum binding
Rifampicin	H	0.015		0.035			0.002		0.001
III&IV	A	>125		>125			>125		>125
VI	B	31.25		31.864			63.095		>125
VIII	C	16.189		14.71			>125		>125
XI	D	16.043		7.318			>125		>125
XIII&XIV	E	64.241		14.347			>125		>125
Total extract	F	31.428		16.04			>125		>125
Rifampicin	H	0.013		0.018			0.001		0.0011
